# Supplementary material for: Room-Temperature Liquid-Phase Exfoliation of MoO3 Nanosheets for Photochromic Smart Windows
Source: Royal Society of Chemistry journal article supplement (doi:10.1039/d5tc03916a), 2026-01-01
Supplement: d5tc03916a1.pdf [file d5tc03916a1.pdf]

**Supporting Materials for**  
**Room-Temperature Liquid-Phase Exfoliation**  
**of MoO<sub>3</sub> Nanosheets for Photochromic Smart Windows**

Sihan Li<sup>a</sup>, Yongkang Zhu<sup>a</sup>, Senwei Wu<sup>a</sup>, Xiujuan Zhao<sup>b</sup>, Shouqin Tian<sup>a</sup>

<sup>a</sup> State Key Laboratory of Silicate Materials for Architectures, Wuhan University of

Technology, Wuhan, 430070, China

<sup>b</sup> State Key Laboratory of Advanced Glass Materials, Wuhan University of

Technology, Wuhan, 430070, China

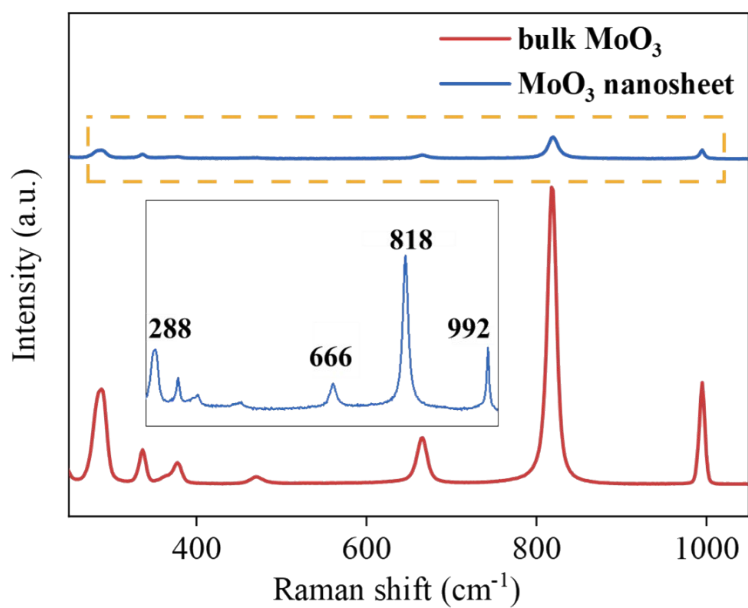

**Figure S1.** The Raman results of  $\text{MoO}_3$  nanosheets and bulk  $\text{MoO}_3$

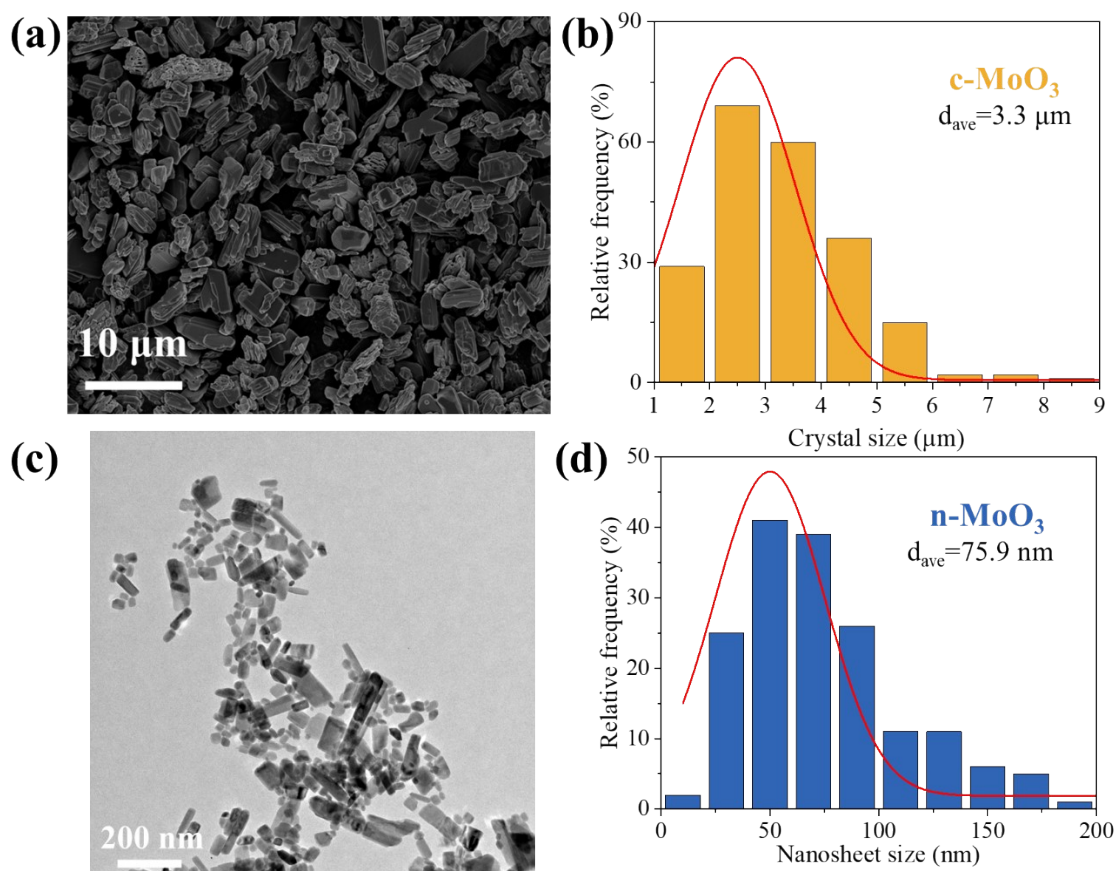

**Figure S2.** (a) The SEM image and (b) corresponding histograms of commercial  $\text{MoO}_3$ . (c) the TEM image and (d) corresponding histograms of  $\text{MoO}_3$  nanosheets.

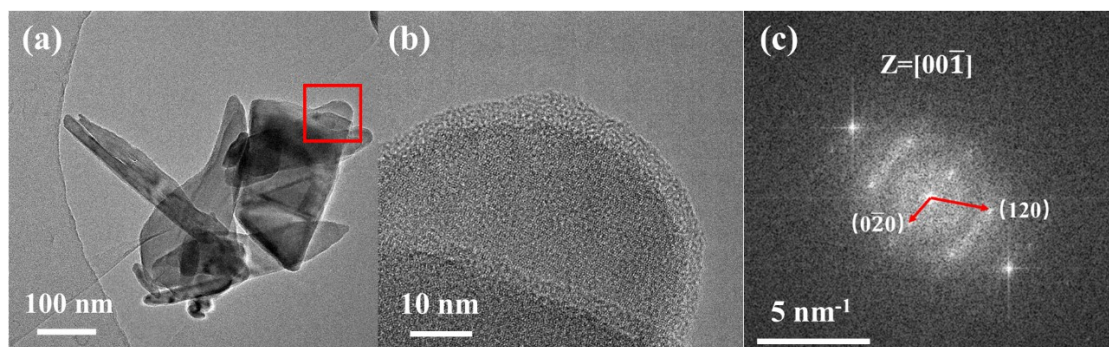

**Figure S3.** (a)The TEM image of MoO<sub>3</sub> nanosheets. (b)HRTEM and (c)SEAD image of MoO<sub>3</sub> nanosheets in the edge.

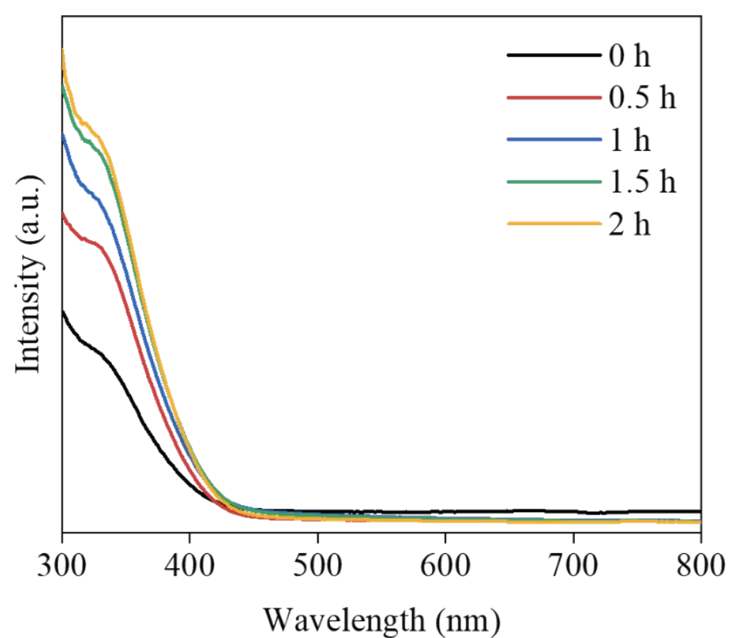

**Figure S4.** UV-Vis absorbance spectra of MoO<sub>3</sub> nanosheets at different ultrasonic time

**Table S1.** The concentration of the nanosheets obtained through weighing and calculation

| Ultrasound treatment time(h) | Container quality (g) | The mass of the container containing the solution (g) | Residual mass(g) | MoO <sub>3</sub> nanosheet concentration(mg/mL) |
|------------------------------|-----------------------|-------------------------------------------------------|------------------|-------------------------------------------------|
| 0                            | 16.6198               | 16.6215                                               | 0.0017           | 0.17                                            |
| 0.5                          | 16.5967               | 16.6001                                               | 0.0034           | 0.34                                            |
| 1                            | 16.7250               | 16.7297                                               | 0.0047           | 0.47                                            |
| 1.5                          | 16.5936               | 16.5988                                               | 0.0052           | 0.52                                            |
| 2                            | 16.2183               | 16.2238                                               | 0.0055           | 0.55                                            |

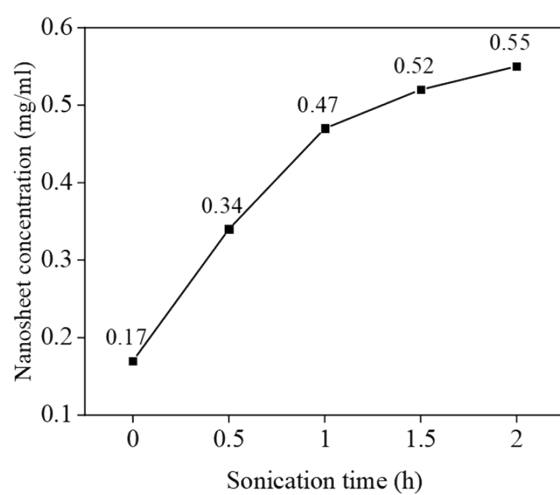

**Figure S5.** The curve shows the variation of nanosheet concentration with ultrasonic time.

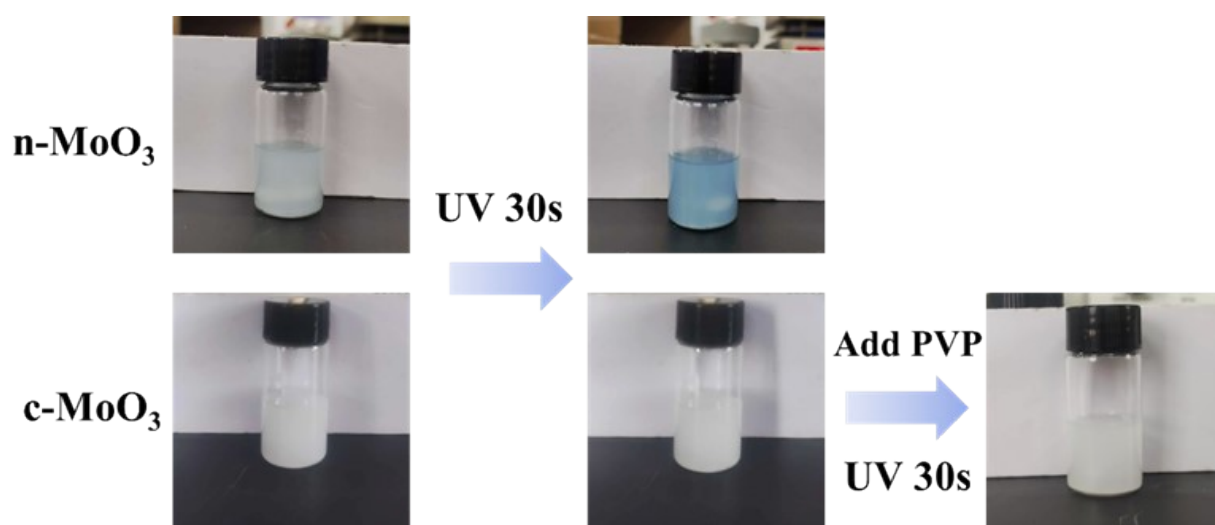

**Figure S6.** Photographs of MoO<sub>3</sub> with/without ultrasonication before UV and after UV

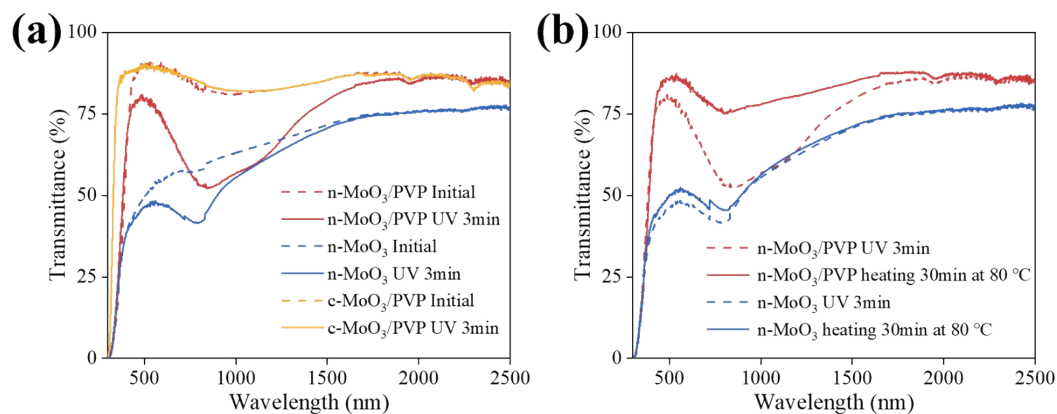

**Figure S7.** (a)Tinting and (b)Bleaching performance of the film of commercial MoO<sub>3</sub>, MoO<sub>3</sub> nanosheet and MoO<sub>3</sub> nanosheet with PVP

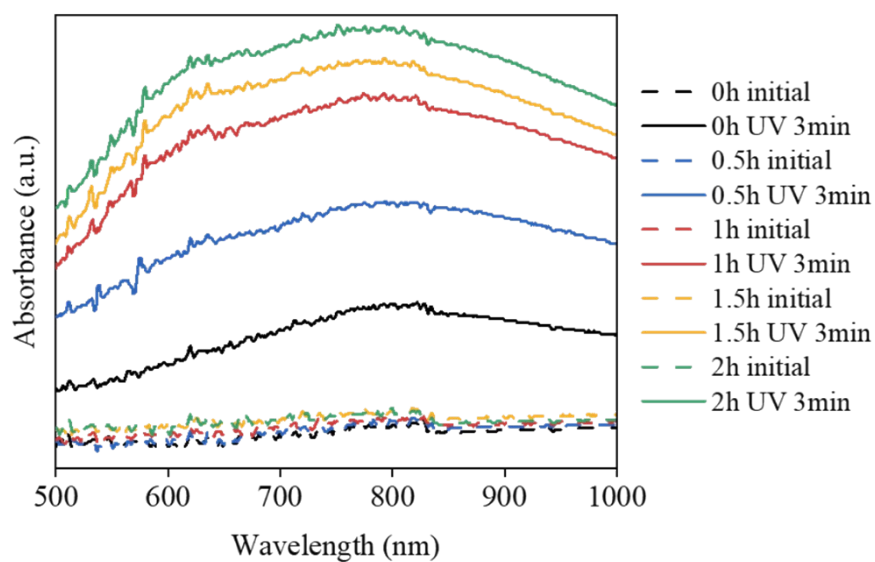

**Figure S8.** The UV-Vis absorbance spectra of initial/colored MoO<sub>3</sub> nanosheets at different ultrasonic times.

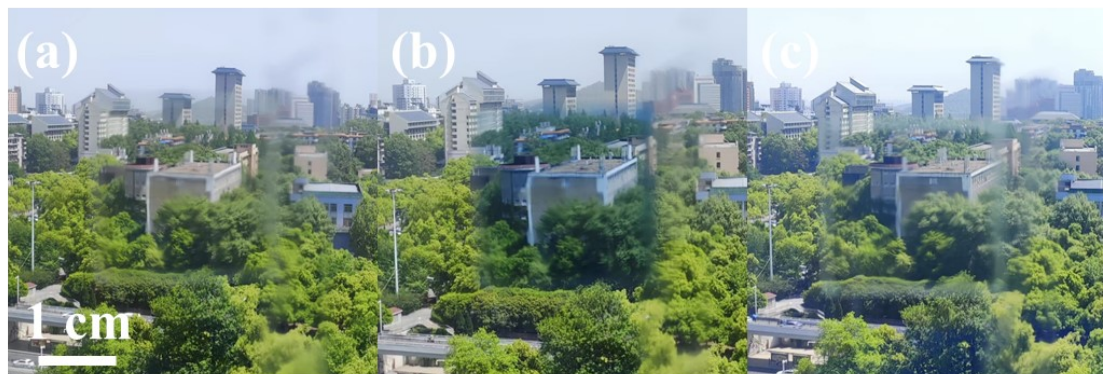

**Figure S9.** The photographs of MoO<sub>3</sub>/PVP composite film at initial (a), tinted (b) and bleached state (c).



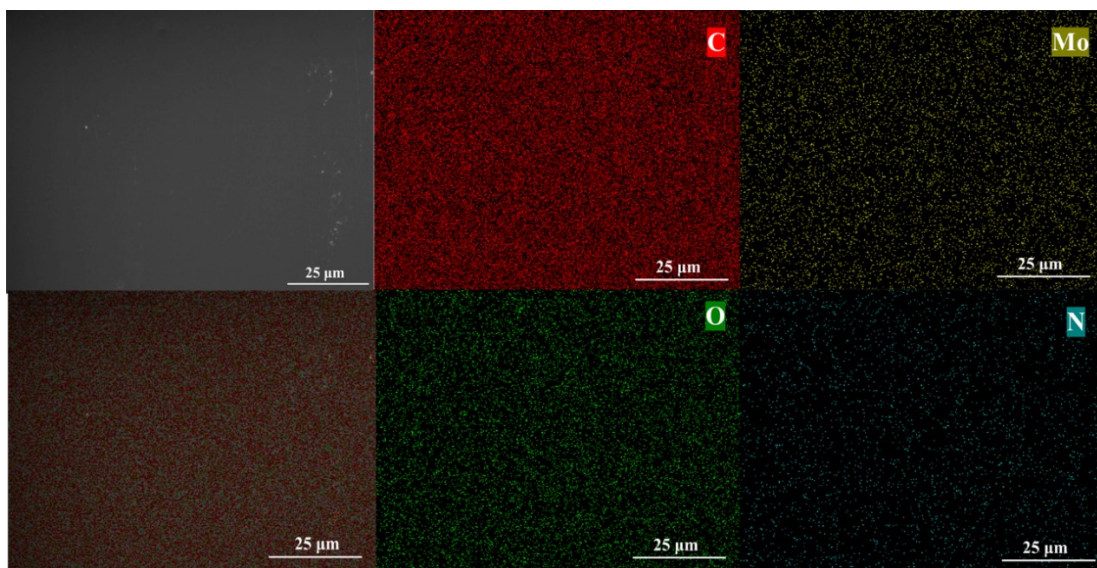

**Figure S10.** The surface element distribution of MoO<sub>3</sub>/PVP composites film.

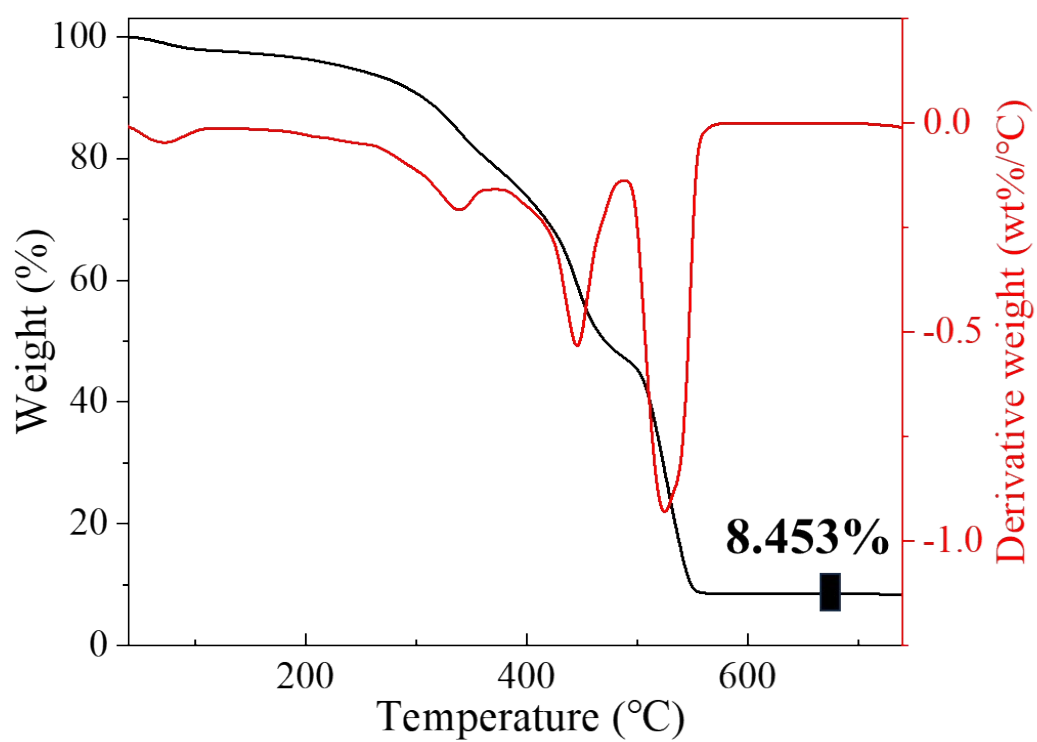

**Figure S11.** The TG and DTG curves of MoO<sub>3</sub>/PVP composites.

**Table S2.** The comparison between this work and other related studies

| Materials                                     | T <sub>lum</sub>         | Tinting speed | $\Delta T$ (major performance)   | Bleaching speed                         | Ref       |
|-----------------------------------------------|--------------------------|---------------|----------------------------------|-----------------------------------------|-----------|
| MoO <sub>3</sub> /PVP                         | 85.8%                    | UV 6min       | $\Delta T_{\text{sol}}=36.4\%$   | 60 min (80 °C)                          | This work |
| MoO <sub>3</sub>                              | N/A                      | UV 42min      | $\Delta T_{\text{sol}}=9.5\%$    | N/A                                     | [S1]      |
| MoO <sub>3</sub> /PVA                         | T <sub>750 nm</sub> =70% | UV 5min       | $\Delta T_{750 \text{ nm}}=65\%$ | 30 min (H <sub>2</sub> O <sub>2</sub> ) | [S2]      |
| Ti doped-W <sub>18</sub> O <sub>49</sub> /PVP | 87.5%                    | UV 10min      | $\Delta T_{\text{sol}}=30.1\%$   | 30 min (80 °C)                          | [S3]      |
| WO <sub>3</sub> /PU/PVP                       | 93.7%                    | UV 5min       | $\Delta T_{\text{sol}}=29.5\%$   | 60 min (60 °C)                          | [S4]      |
| WO <sub>3</sub> /sago starch                  | 37.8%                    | UV 4min       | $\Delta T_{\text{sol}}=4.79\%$   | 50 min (dark)                           | [S5]      |
| WO <sub>3</sub> /PVP                          | T <sub>550 nm</sub> =85% | UV 1min       | $\Delta T_{550 \text{ nm}}=40\%$ | >2h (80 °C)                             | [S6]      |
| WO <sub>3</sub> /MC/ EG                       | T <sub>640 nm</sub> =85% | UV 10min      | N/A                              | 3 days (dark)                           | [S7]      |

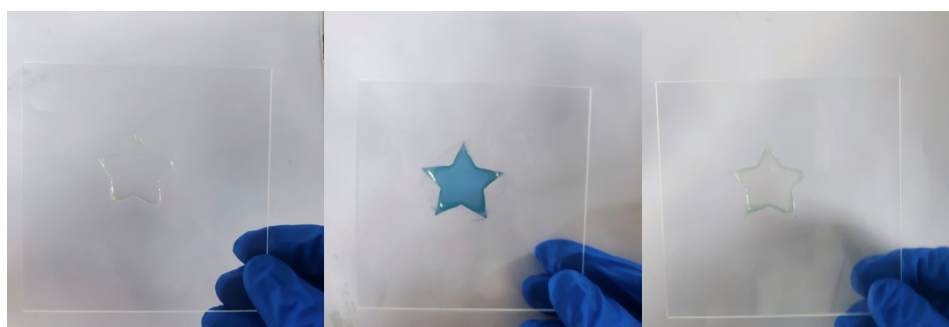**Figure S12.** MoO<sub>3</sub> nanosheets applied as optical display medium application

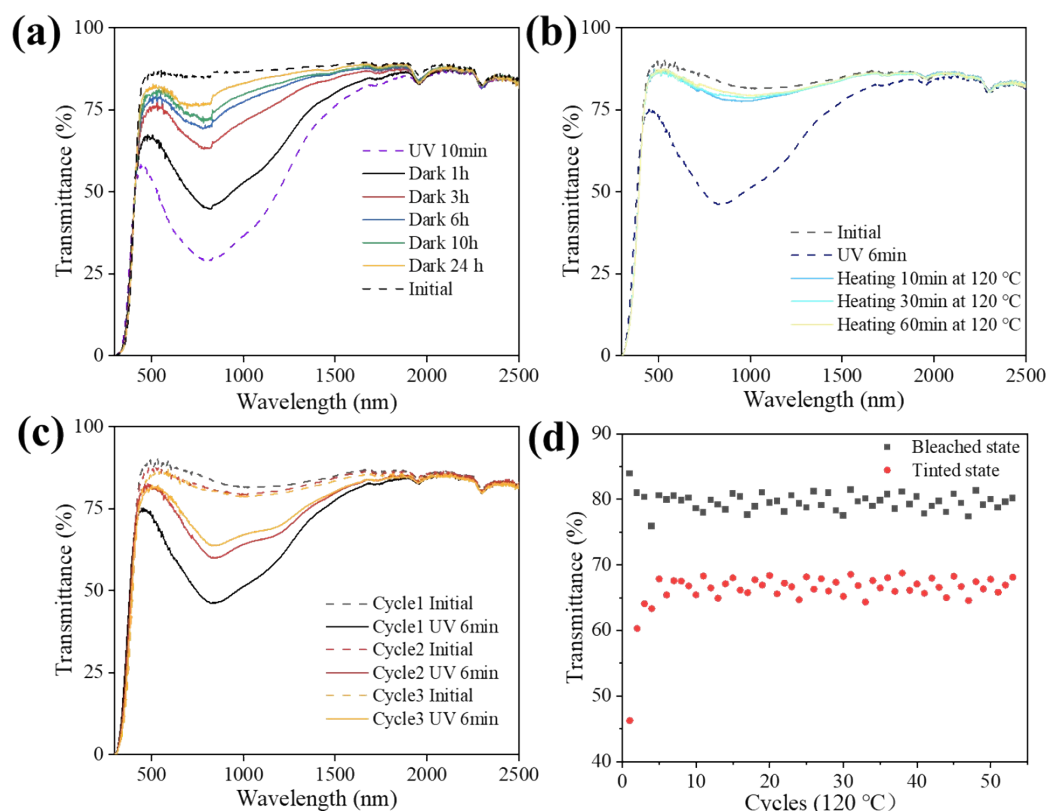

**Figure S13.** MoO<sub>3</sub> nanosheets film's transmittance spectra at different time under bleaching process at (a) room temperature (25 °C) and (b) 120 °C. (c) Second and third cycles of such film heated at 120 °C. (d) Cyclical performance of the MoO<sub>3</sub> nanosheets film heated at 120 °C.

## Reference

- [S1] Samad BA, The effect of coloration on optical properties of molybdenum trioxide thin films prepared by thermal evaporation technique. 2020 Photonics North (PN); 2020: IEEE.
- [S2] Cheng C, Zheng Z, Wang A. Fabrication of novel MoO<sub>x</sub>/PVA hydrogel nanocomposite for photochromic smart window. *Optical Materials*. 2024;157:116293.
- [S3] Ma T, Li B, Tian S, Qian J, Zhou L, Liu Q, et al. Reversible photochromic W<sub>18</sub>O<sub>49</sub>: Mechanism revealing and performance improvement for smart windows. *Chemical Engineering Journal*. 2023;468:143587.
- [S4] Li R, Zhou Y, Shao Z, Zhao S, Chang T, Huang A, et al. Enhanced coloration/bleaching photochromic performance of WO<sub>3</sub> based on PVP/PU composite matrix. *ChemistrySelect*. 2019;4(33):9817-21.



- [S5] Kaur J, Kaur N, Sharma A. Enhanced photochromic properties of 1D h-WO<sub>3</sub> embedded in bio-degradable polymer for fabrication of smart windows. *Materials Science and Engineering: B*. 2024;299:116931.
- [S6] Zhou Y, Huang A, Ji S, Zhou H, Jin P, Li R. Scalable preparation of photochromic composite foils with excellent reversibility for light printing. *Chemistry—An Asian Journal*. 2018;13(4):457-62.
- [S7] Yamazaki S, Isoyama K, Shimizu D. Visualization of ultraviolet irradiation using WO<sub>3</sub>-cellulose derivatives composite film. *Optical Materials*. 2020;106:109929.
